# Supplementary material for: The Ciliary Protein Arl13b Functions Outside of the Primary Cilium in Shh-Mediated Axon Guidance
Source: PubMed Central journal article supplement — Cell Rep. Author manuscript; Available in PMC 2019 Dec 23. (PMC6927553; doi:10.1016/j.celrep.2019.11.015), 2019-12-10
Supplement: NIHMS1546253-supplement-1.pdf [file NIHMS1546253-supplement-1.pdf]

**Cell Reports, Volume 29**

## **Supplemental Information**

### **The Ciliary Protein Arl13b Functions**

#### **Outside of the Primary Cilium**

#### **in Shh-Mediated Axon Guidance**

**Julien Ferent, Sandii Constable, Eduardo D. Gigante, Patricia T. Yam, Laura E. Mariani, Emilie Legué, Karel F. Liem Jr., Tamara Caspary, and Frédéric Charron**

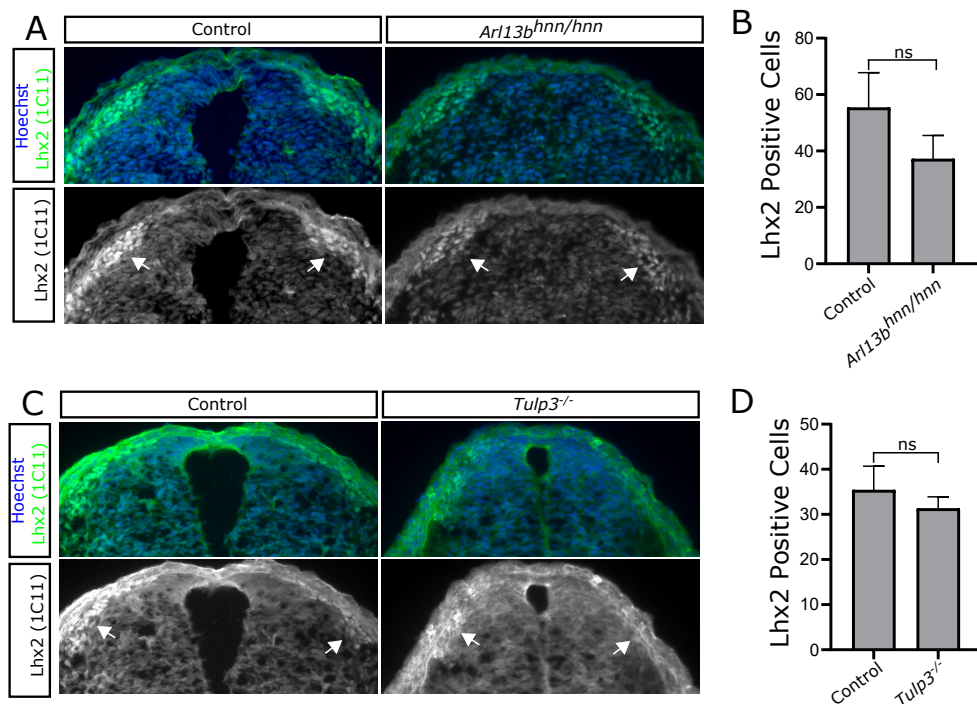

**Figure S1. Lhx2<sup>+</sup> cell number is not affected in *Arl13b<sup>hnn/hnn</sup>* and *Tulp3<sup>-/-</sup>* embryos.** Related to Figures 1 and 2.

(A) Lhx2 immunostaining in the neural tube of control and *Arl13b<sup>hnn/hnn</sup>* embryos. Forelimb-level E11.5 neural tube sections were stained for Lhx2 positive cells (1:100; DHSB PCR-P-LHX2-1C11). (B) The number of Lhx2 positive cells in 3-4 neural tube sections per embryo was quantified. Each section was separated by ~100-200  $\mu$ m along the anterior-posterior axis representing different segments of the forelimb neural tube region. Cell counting was performed in Image J software (NIH; Bethesda, MD). Data are presented as average number of Lhx2-positive cells ( $\pm$ SD) and analyzed by Student's t test. Number of embryos examined per genotype n = 3-4. (C) Lhx2 immunostaining in the neural tube of control and *Tulp3<sup>-/-</sup>* embryos. (D) Quantification of the number of Lhx2 positive cells in 3-4 neural tube sections per embryo. Number of embryos examined per genotype n = 3-4.

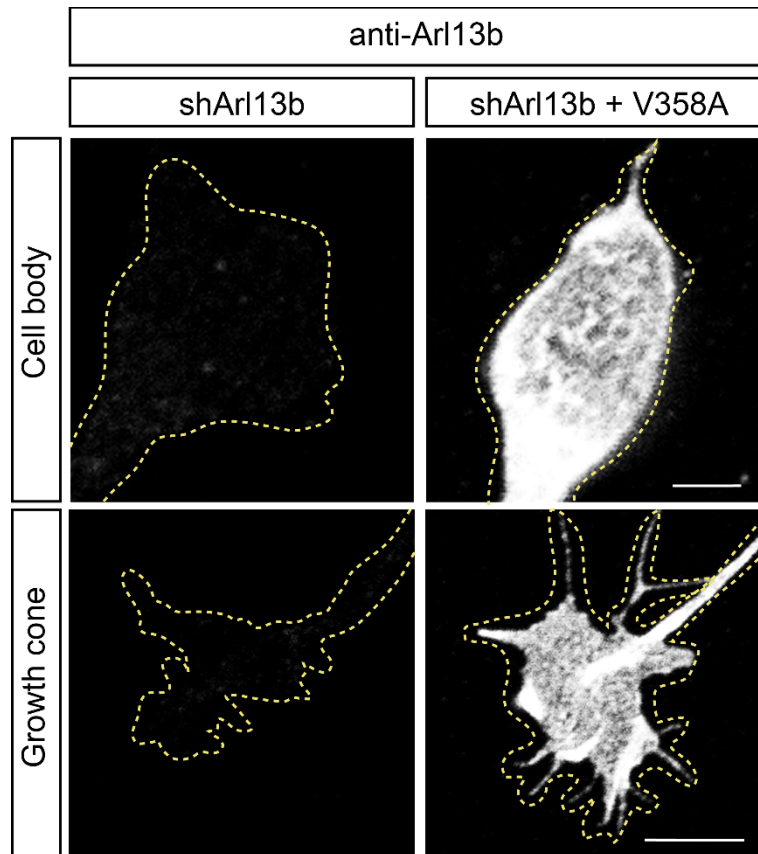

**Figure S2. The Arl13b antibody can recognize the V358A mutant form.** Related to Figure 4.

Arl13b immunostaining on commissural neurons 2 days after electroporation with either shArl13b alone or in combination with the Arl13b<sup>V358A</sup>-GFP expression vector. The antibody detects a strong signal when Arl13b<sup>V358A</sup>-GFP is expressed, showing that this variant can still be detected by the anti-Arl13b antibody at the cell body and growth cone levels.

Scale bar, top row: 5  $\mu$ m, bottom row: 10  $\mu$ m.

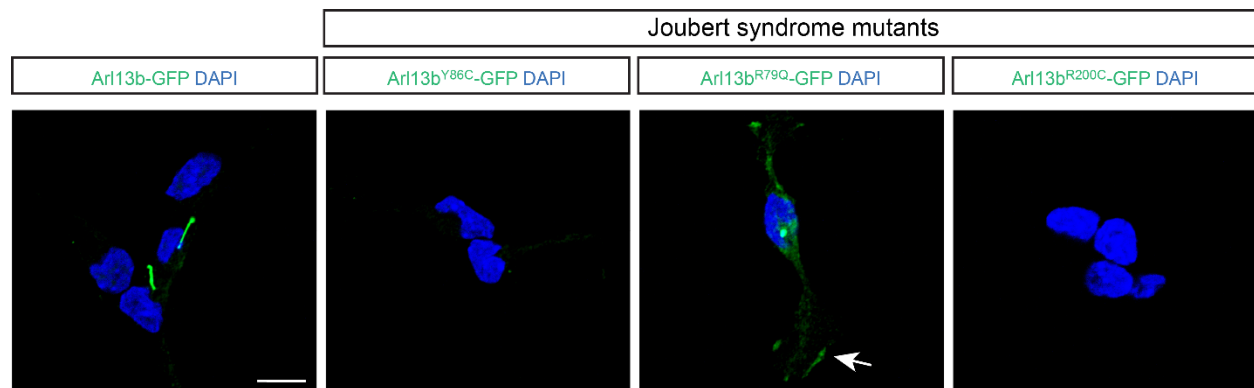

**Figure S3. Expression and localization of Arl13b Joubert syndrome mutants in commissural neurons.** Related to Figure 4.

GFP signal in commissural neurons 2 days after electroporation with Arl13b-GFP, Arl13b<sup>Y86C</sup>-GFP, Arl13b<sup>R79Q</sup>-GFP or Arl13b<sup>R200C</sup>-GFP expression vector. Wild type Arl13b-GFP shows a clear signal within the primary cilia. Amongst the Joubert syndrome mutants, Arl13b<sup>R79Q</sup>-GFP shows a signal present in the primary cilia, the cell body, the processes and growth cone (arrow). Arl13b<sup>Y86C</sup>-GFP and Arl13b<sup>R200C</sup>-GFP are not expressed in commissural neurons. The reason(s) for this remains elusive but could be due to a rapid degradation of the mutant protein, for example.

Scale bar, 10  $\mu$ m.
